# Supplementary material
Source: PubMed Central journal article supplement (PMC3312377)
Supplement: NIHMS357791-supplement-1_si_001.pdf [file NIHMS357791-supplement-1_si_001.pdf]

TABLE S1: Rate constants and amplitudes for H/D exchange into selected peptides<sup>a</sup>.

| Peptide  |             | Total #<br>exchangeable amide<br>H | # H Fast<br>exchanged at<br>$k > 4 \text{ min}^{-1}$ , <sup>b</sup> | Fast exchange,<br>% of total | $A_1$ (D)       | $k_1$ ( $\text{min}^{-1}$ ) | $A_2$ (D)        | $k_2$ ( $\text{min}^{-1}$ ) |
|----------|-------------|------------------------------------|---------------------------------------------------------------------|------------------------------|-----------------|-----------------------------|------------------|-----------------------------|
| 9-18     | mG $\alpha$ | 9                                  | 1.5                                                                 | 16.9                         | $1.28 \pm 0.08$ | $0.86 \pm 0.13$             | $6.26 \pm 0.05$  | $0.04 \pm 0.005$            |
| 9-18     | G $\alpha$  | 9                                  | 2.7                                                                 | 29.9                         | $2.05 \pm 0.22$ | $0.81 \pm 0.21$             | $4.46 \pm 0.16$  | $0.005 \pm 0.002$           |
| 24-34    | mG $\alpha$ | 10                                 | 4.8                                                                 | 47.5                         | $4.64 \pm 0.27$ | $1.42 \pm 0.18$             | $1.20 \pm 0.14$  | $0.03 \pm 0.01$             |
| 24-34    | G $\alpha$  | 10                                 | 5.6                                                                 | 56.0                         | $3.25 \pm 0.25$ | $1.33 \pm 0.23$             | $1.51 \pm 0.19$  | $0.05 \pm 0.01$             |
| 37-52    | mG $\alpha$ | 15                                 | 3.3                                                                 | 22.3                         | $3.98 \pm 0.78$ | $2.61 \pm 0.68$             | $8.65 \pm 0.13$  | $0.004 \pm 0.001$           |
| 37-52    | G $\alpha$  | 15                                 | 0.3                                                                 | 2.0                          | $3.83 \pm 2.15$ | $2.93 \pm 1.08$             | $11.84 \pm 0.09$ | $0.0065 \pm 0.0005$         |
| 55-80    | mG $\alpha$ | 25                                 | 9.9                                                                 | 39.5                         | $3.92 \pm 0.37$ | $0.28 \pm 0.05$             | $10.94 \pm 0.40$ | $0.005 \pm 0.001$           |
| 55-80    | G $\alpha$  | 25                                 | 9.6                                                                 | 38.5                         | $2.72 \pm 0.88$ | $0.35 \pm 0.16$             | $12.47 \pm 0.96$ | $0.0137 \pm 0.005$          |
| 83-91    | mG $\alpha$ | 8                                  | 3.2                                                                 | 39.8                         | $1.00 \pm 0.16$ | $0.74 \pm 0.29$             | $0.87 \pm 0.14$  | $0.017 \pm 0.01$            |
| 83-91    | G $\alpha$  | 8                                  | 3.9                                                                 | 48.8                         | $1.07 \pm 0.05$ | $0.02 \pm 0.01$             |                  |                             |
| 92-103   | mG $\alpha$ | 11                                 | 5.5                                                                 | 49.6                         | $4.11 \pm 0.60$ | $1.54 \pm 0.47$             | $1.82 \pm 0.42$  | $0.07 \pm 0.03$             |
| 92-103   | G $\alpha$  | 11                                 | 6.9                                                                 | 62.6                         | $3.22 \pm 0.39$ | $1.04 \pm 0.30$             | $2.17 \pm 0.30$  | $0.03 \pm 0.01$             |
| 107-110  | mG $\alpha$ | 3                                  | 0.4                                                                 | 13.0                         | $2.85 \pm 0.17$ | $0.84 \pm 0.09$             |                  |                             |
| 107-110  | G $\alpha$  | 3                                  | 1.0                                                                 | 34.0                         | $2.18 \pm 0.03$ | $0.96 \pm 0.02$             |                  |                             |
| 111-123* | mG $\alpha$ | 18                                 | 14.9                                                                | 82.8                         | $3.58 \pm 0.30$ | $1.17 \pm 0.16$             |                  |                             |
| 111-123* | G $\alpha$  | 18                                 | 17.0                                                                | 94.5                         | $1.17 \pm 0.13$ | $0.77 \pm 0.17$             |                  |                             |
| 124-139  | mG $\alpha$ | 15                                 | 1.5                                                                 | 9.7                          | $1.97 \pm 0.39$ | $1.76 \pm 0.56$             | $11.88 \pm 0.12$ | $0.004 \pm 0.0006$          |
| 124-139  | G $\alpha$  | 15                                 | 1.5                                                                 | 9.7                          | $1.32 \pm 0.17$ | $3.65 \pm 0.50$             | $12.60 \pm 0.18$ | $0.005 \pm 0.0001$          |
| 140-153  | mG $\alpha$ | 13                                 | 2.0                                                                 | 15.2                         | $5.35 \pm 0.57$ | $1.26 \pm 0.28$             | $6.23 \pm 0.38$  | $0.04 \pm 0.006$            |
| 140-153  | G $\alpha$  | 13                                 | 3.2                                                                 | 24.2                         | $3.61 \pm 0.95$ | $2.18 \pm 0.89$             | $6.95 \pm 0.23$  | $0.013 \pm 0.002$           |
| 154-159  | mG $\alpha$ | 5                                  | 0.0                                                                 | 0.0                          | $2.18 \pm 0.12$ | $0.80 \pm 0.14$             | $3.06 \pm 0.09$  | $0.005 \pm 0.001$           |
| 154-159  | G $\alpha$  | 5                                  | 0.6                                                                 | 11.2                         | $1.80 \pm 0.07$ | $0.79 \pm 0.08$             | $2.73 \pm 0.06$  | $0.06 \pm 0.01$             |
| 159-172  | mG $\alpha$ | 11                                 | 5.6                                                                 | 50.8                         | $2.67 \pm 0.19$ | $0.91 \pm 0.15$             | $2.80 \pm 0.13$  | $0.002 \pm 0.0002$          |
| 159-172  | G $\alpha$  | 11                                 | 4.5                                                                 | 40.8                         | $2.71 \pm 0.14$ | $1.65 \pm 0.15$             | $3.70 \pm 0.05$  | $0.005 \pm 0.0009$          |
| 177-192  | mG $\alpha$ | 15                                 | 4.6                                                                 | 30.5                         | $5.87 \pm 1.44$ | $1.37 \pm 0.75$             | $5.25 \pm 1.31$  | $0.10 \pm 0.03$             |
| 177-192  | G $\alpha$  | 15                                 | 4.7                                                                 | 31.5                         | $3.29 \pm 0.29$ | $0.49 \pm 0.11$             | $7.08 \pm 0.31$  | $0.012 \pm 0.002$           |
| 196-208  | mG $\alpha$ | 12                                 | 0.8                                                                 | 6.6                          | $2.88 \pm 0.37$ | $2.04 \pm 0.41$             | $8.80 \pm 0.11$  | $0.006 \pm 0.0007$          |
| 196-208  | G $\alpha$  | 12                                 | 1.6                                                                 | 13.0                         | $0.86 \pm 0.46$ | $2.39 \pm 1.53$             | $9.78 \pm 0.09$  | $0.006 \pm 0.0006$          |
| 199-214  | mG $\alpha$ | 15                                 | 4.3                                                                 | 28.9                         | $9.30 \pm 0.79$ | $2.25 \pm 0.30$             | $3.35 \pm 0.22$  | $0.044 \pm 0.007$           |
| 199-214  | G $\alpha$  | 15                                 | 7.9                                                                 | 52.9                         | $4.72 \pm 0.95$ | $1.20 \pm 0.56$             | $2.89 \pm 0.85$  | $0.07 \pm 0.003$            |
| 209-222  | mG $\alpha$ | 13                                 | 6.9                                                                 | 52.8                         | $4.94 \pm 0.31$ | $1.80 \pm 0.21$             | $1.83 \pm 0.14$  | $0.017 \pm 0.005$           |
| 209-222  | G $\alpha$  | 13                                 | 8.3                                                                 | 63.8                         | $2.33 \pm 0.17$ | $0.95 \pm 0.16$             | $1.99 \pm 0.16$  | $0.05 \pm 0.007$            |
| 225-227  | mG $\alpha$ | 2                                  | 0.7                                                                 | 33.5                         | $1.30 \pm 0.06$ | $1.54 \pm 0.09$             |                  |                             |
| 225-227  | G $\alpha$  | 2                                  | 1.0                                                                 | 50.0                         | $0.93 \pm 0.13$ | $1.46 \pm 0.31$             |                  |                             |
| 232-234  | mG $\alpha$ | 2                                  | 0.5                                                                 | 23.5                         | $0.80 \pm 0.11$ | $0.73 \pm 0.23$             | $0.77 \pm 0.11$  | $0.03 \pm 0.008$            |
| 232-234  | G $\alpha$  | 2                                  | 0.1                                                                 | 7.0                          | $1.89 \pm 0.04$ | $0.09 \pm 0.01$             |                  |                             |
| 241-249  | mG $\alpha$ | 8                                  | 0.5                                                                 | 5.6                          | $1.51 \pm 0.23$ | $0.86 \pm 0.33$             | $6.07 \pm 0.18$  | $0.01 \pm 0.002$            |
| 241-249  | G $\alpha$  | 8                                  | 0.1                                                                 | 1.3                          | $1.18 \pm 0.23$ | $0.93 \pm 0.40$             | $6.81 \pm 0.17$  | $0.10 \pm 0.00156$          |
| 250-258  | mG $\alpha$ | 8                                  | 3.7                                                                 | 45.9                         | $2.05 \pm 0.24$ | $1.46 \pm 0.32$             | $2.52 \pm 0.11$  | $0.0138 \pm 0.0029$         |
| 250-258  | G $\alpha$  | 8                                  | 4.6                                                                 | 57.8                         | $1.33 \pm 0.13$ | $0.52 \pm 0.12$             | $2.09 \pm 0.13$  | $0.009 \pm 0.003$           |
| 267-274  | mG $\alpha$ | 7                                  | 0.5                                                                 | 6.6                          | $2.01 \pm 0.28$ | $1.98 \pm 0.42$             | $4.87 \pm 0.08$  | $0.0026 \pm 0.001$          |
| 267-274  | G $\alpha$  | 7                                  | 1.0                                                                 | 13.6                         | $1.46 \pm 0.14$ | $0.80 \pm 0.20$             | $4.71 \pm 0.10$  | $0.0005 \pm 0.0001$         |
| 274-287  | mG $\alpha$ | 12                                 | 2.8                                                                 | 23.3                         | $4.12 \pm 0.62$ | $1.34 \pm 0.43$             | $5.64 \pm 0.41$  | $0.04 \pm 0.007$            |
| 274-287  | G $\alpha$  | 12                                 | 4.3                                                                 | 35.5                         | $6.83 \pm 0.17$ | $0.13 \pm 0.01$             |                  |                             |
| 307-318  | mG $\alpha$ | 11                                 | 1.4                                                                 | 12.9                         | $5.80 \pm 0.36$ | $1.14 \pm 0.01$             | $4.30 \pm 0.19$  | $0.004 \pm 0.002$           |
| 307-318  | G $\alpha$  | 11                                 | 4.4                                                                 | 39.8                         | $4.45 \pm 0.37$ | $1.88 \pm 0.25$             | $2.79 \pm 0.12$  | $0.005 \pm 0.002$           |
| 308-323  | mG $\alpha$ | 15                                 | 4.4                                                                 | 29.5                         | $8.62 \pm 0.46$ | $1.96 \pm 0.18$             | $3.47 \pm 0.22$  | $0.064 \pm 0.008$           |
| 308-323  | G $\alpha$  | 15                                 | 6.4                                                                 | 42.7                         | $5.30 \pm 0.26$ | $1.30 \pm 0.12$             | $3.90 \pm 0.15$  | $0.03 \pm 0.003$            |
| 322-330  | mG $\alpha$ | 8                                  | 0.7                                                                 | 9.3                          | $2.29 \pm 0.23$ | $0.93 \pm 0.22$             | $5.16 \pm 0.16$  | $0.006 \pm 0.001$           |
| 322-330  | G $\alpha$  | 8                                  | 0.9                                                                 | 11.0                         | $3.43 \pm 0.63$ | $1.92 \pm 0.59$             | $3.33 \pm 0.24$  | $0.04 \pm 0.007$            |
| 334-336  | mG $\alpha$ | 2                                  | 0.1                                                                 | 5.0                          | $0.84 \pm 0.17$ | $1.27 \pm 0.51$             | $2.14 \pm 0.08$  | $0.0015 \pm 0.0002$         |
| 334-336  | G $\alpha$  | 2                                  | 0.5                                                                 | 22.5                         | $0.28 \pm 0.06$ | $1.07 \pm 0.53$             | $1.35 \pm 0.03$  | $0.005 \pm 0.0001$          |
| 341-353  | mG $\alpha$ | 12                                 | 8.2                                                                 | 68.4                         | $1.88 \pm 0.47$ | $1.86 \pm 0.77$             | $1.17 \pm 0.16$  | $0.02 \pm 0.01$             |
| 341-353  | G $\alpha$  | 12                                 | 7.7                                                                 | 64.3                         | $2.49 \pm 0.34$ | $1.95 \pm 0.42$             | $2.18 \pm 0.10$  | $0.017 \pm 0.003$           |

<sup>a</sup> Parameters obtained from fitting the H/D-exchange kinetics of Fig. 1B according to the single or double exponential expression of Eq. (2). The number in parentheses is the total number of exchangeable amide hydrogens.

<sup>b</sup> The amount of exchange before the first time point is estimated from the fit parameters and has a rate faster than  $4 \text{ min}^{-1}$ .
