# Supplementary material
Source: PubMed Central journal article supplement (PMC3312377)

## Supplementary Figures

**Fig. S1:** Pepsin cleavage map of  $G\alpha_i$ . Peptides indicated by solid arrows indicate peptides used for H/D-exchange analysis due to their abundance, signal-to noise, and isotopic envelopes. Peptides were separated by reverse-phase HPLC, and eluted peptides were unambiguously identified by high-resolution MS/MS fragmentation by collision-induced dissociation as described in methods. Dotted arrows indicate mapped peptides which were not well resolved in  $G\alpha$  H/D exchange experiments. Grey bar and asterisk denotes hexahistadine tag.

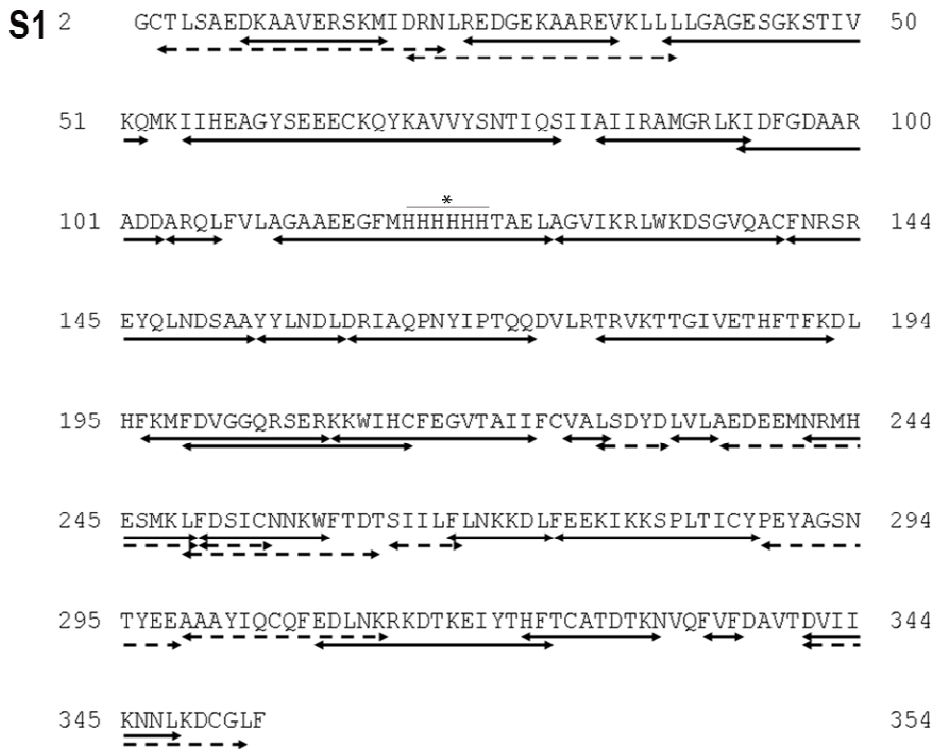

**Fig. S2:** A. Control demonstrating that bimine labeled  $G\alpha_i$  HI protein m3C-B, W211F is competent to exchange GDP for BD-GTP $\gamma$ S. Shown are the maximal levels of BD-GTP $\gamma$ S fluorescence (ex/em 485/515 nm) for myr  $G\alpha_i$  HI and  $G\alpha_i$  HI m3C-B, W211F as compared to maximum level of binding for wild-type myr  $G\alpha_i$ , left bar, set to 1.0. Boiling abrogated the nucleotide binding properties of all three proteins. BD-GTP $\gamma$ S binding

is measured as increase in BD-GTP $\gamma$ S fluorescence 1 hr after addition of G $\alpha$ GDP as described in methods. Data are the average of 3 independent experiments; results are mean  $\pm$  SEM. B. Tryptic digests performed as described in methods on G $\alpha_i$  proteins in the inactive (GDP) versus active (GDP-AIF $_4$ ) states confirms that the bimane-labeled W211F myrG $\alpha_i$  HI-3C protein (upper panel) retains the ability to undergo activation-dependent changes similar to unlabeled wild-type G $\alpha_i$  protein (bottom panel). U, untreated samples; 5 and 30 refer to bimane labeled samples treated for 5 and 30 minutes, respectively, with wild type G $\alpha_i$  samples digested for periods ranging from 15 minutes to 1.5 hours.

**Fig. S2A**

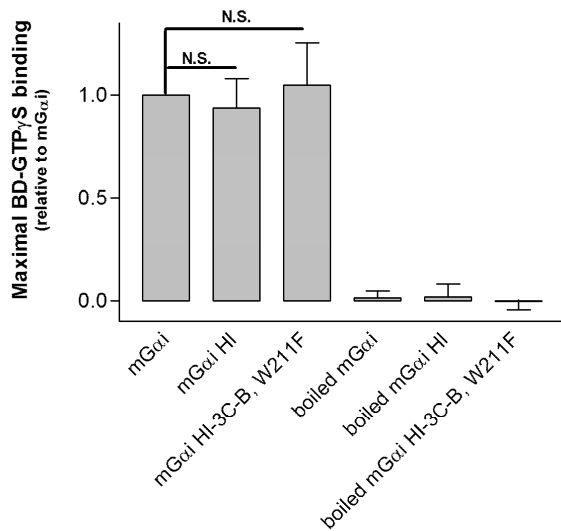

**S2B.**

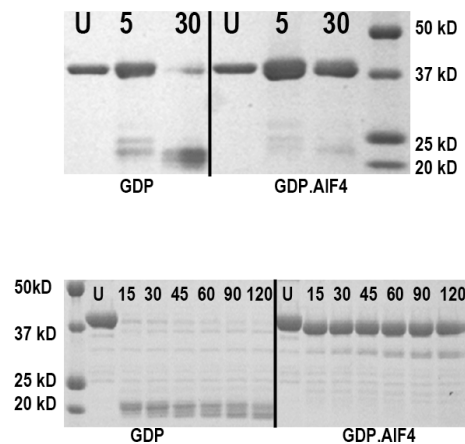

Supplement: NIHMS357791-supplement-2_si_002.pdf [file NIHMS357791-supplement-2_si_002.pdf]
